# Supplementary material for: The WWOX/HIF1A Axis Downregulation Alters Glucose Metabolism and Predispose to Metabolic Disorders
Source: Int J Mol Sci. 2022 Mar 19;23(6):3326. doi: 10.3390/ijms23063326 (PMC8955937; doi:10.3390/ijms23063326)
Supplement: Supplementary file 1 [file ijms-23-03326-s001.zip]

Archive with 9 entries (9 files):
- Figure S1.tif
- Figure S2.tif
- Figure S3.tif
- Figure S4.tif
- Figure S5.tif
- Figure S6A.tif
- Figure S6B.tif
- FigureS6C.tif
- Supplementary figures captions.pdf
